# Supplementary material for: Chemical defense in developmental stages and adult of the sea star Echinaster (Othilia) brasiliensis
Source: PeerJ. 2021 Jun 18;9:e11503. doi: 10.7717/peerj.11503 (PMC8216172; doi:10.7717/peerj.11503)
Supplement: Supplemental Information 2 [file peerj-09-11503-s002.xlsx]

## Sheet: Blastula 1d FigA
Sympatric crab vs. Developmental stages n=10
Control	Treatment
1	0
1	0
1	0
1	0
1	0
1	0
1	0
1	0
1	0
1	0
1: means acceptance of item
0: means rejection of item

## Sheet: Late brachiolaria 8d FigA
Sympatric crab vs. Developmental stages n=11
Control	Treatment
1	0
1	0
1	0
1	0
1	0
1	0
1	0
1	0
1	0
1	0
1	0
1: means acceptance of item
0: means rejection of item

## Sheet: Late brachiolaria 13d FigA
Sympatric crab vs. Developmental stages n=12
Control	Treatment
1	0
1	0
1	0
1	0
1	0
1	0
1	0
1	0
1	0
1	0
1	0
1	0
1: means acceptance of item
0: means rejection of item

## Sheet: Set1 Blastula 2d (Methanol)FigB
Sympatric Crab vs. Extracts n= 10
Control	Treatment
1	0
1	1
1	0
1	0
1	0
1	0
1	1
1	1
1	0
1	0
1: means acceptance of item
0: means rejection of item

## Sheet: Set2 Blastula 2d (Methanol)FigB
Sympatric Crab vs. Extracts n= 8
Control	Treatment
1	0
1	0
1	0
1	0
1	1
1	0
1	0
1	0
1: means acceptance of item
0: means rejection of item

## Sheet: LateBrachiolaria13d (DCM_ET.AC)
Sympatric Crab vs. Extracts n= 6
Control	Treatment
1	1
1	1
1	1
1	1
1	1
1	1
1: means acceptance of item
0: means rejection of item

## Sheet: LateBrachiolaria13d(ET_MET)FigB
Sympatric Crab vs. Extracts n= 7
Control	Treatment
1	1
1	1
1	0
1	0
1	1
1	1
1	1
1: means acceptance of item
0: means rejection of item
