# Supplementary material for: Chemical defense in developmental stages and adult of the sea star Echinaster (Othilia) brasiliensis
Source: PeerJ. 2021 Jun 18;9:e11503. doi: 10.7717/peerj.11503 (PMC8216172; doi:10.7717/peerj.11503)
Supplement: Supplemental Information 4 [file peerj-09-11503-s004.xlsx]

## Sheet: Set 1 Blastula 1d (Fig 2A)
SYMPATRIC CRAB
Crab vs. Developmental stages n= 14
Control	Treatment
1	0
1	0
1	0
1	0
1	0
1	0
1	0
1	0
1	1
1	0
1	0
1	0
1	0
1	0
1: means acceptance of item
0: means rejection of item

## Sheet: Set 2 Blastula 1d (Fig 2A)
SYMPATRIC CRAB
Crab vs. Developmental stages n= 15
Control	Tratament
1	0
1	0
1	0
1	0
1	0
1	0
1	0
1	0
1	0
1	0
1	0
1	0
1	0
1	0
1	0
1: means acceptance of item
0: means rejection of item

## Sheet: Set1 EarlyBrachiolaria3d (Fig2A
SYMPATRIC CRAB
Crab vs. Developmental stages n= 16
Control	Treatment
1	0
1	0
1	0
1	0
1	0
1	0
1	0
1	0
1	0
1	0
1	0
1	0
1	0
1	0
1	0
1	0
1: means acceptance of item
0: means rejection of item

## Sheet: Set2 EarlyBrachiolaria3d (Fig2A
SYMPATRIC CRAB
Crab vs. Developmental stages n= 16
Control	Treatment
1	1
1	1
1	0
1	0
1	0
1	1
1	0
1	0
1	0
1	0
1	0
1	0
1	0
1	0
1	0
1	0
1: means acceptance of item
0: means rejection of item

## Sheet: Set1 LateBrachiolaria 6d (Fig2A
SYMPATRIC CRAB
Crab vs. Developmental stages n= 16
Control	Treatment
1	0
1	0
1	0
1	0
1	0
1	0
1	0
1	0
1	0
1	0
1	0
1	0
1	0
1	0
1	0
1	0
1: means acceptance of item
0: means rejection of item

## Sheet: Set2 LateBrachiolaria 6d (Fig2A
SYMPATRIC CRAB
Crab vs. Developmental stages n= 15
Control	Treatment
1	0
1	0
1	0
1	0
1	0
1	0
1	0
1	0
1	0
1	0
1	0
1	0
1	0
1	0
1	0
1: means acceptance of item
0: means rejection of item

## Sheet: Set 1 Blastula 1d (Fig 2B)
ALLOPATRIC CRAB
Crab vs. Developmental stages n= 12
Control	Treatment
1	0
1	0
1	0
1	0
1	1
1	0
1	0
1	0
1	1
1	0
1	0
1	0
1: means acceptance of item
0: means rejection of item

## Sheet: Set 2 Blastula 1d (Fig 2B)
ALLOPATRIC CRAB
Crab vs. Developmental stages n= 16
Control	Treatment
1	0
1	0
1	0
1	0
1	0
1	0
1	0
1	0
1	0
1	0
1	0
1	0
1	0
1	0
1	0
1	0
1: means acceptance of item
0: means rejection of item

## Sheet: Set1 EarlyBrachiolaria3d (Fig2B
ALLOPATRIC CRAB
Crab vs. Developmental stages n= 10
Control	Treatment
1	1
1	0
1	1
1	1
1	0
1	1
1	0
1	0
1	0
1	0
1: means acceptance of item
0: means rejection of item

## Sheet: Set2 EarlyBrachiolaria3d (Fig2B
ALLOPATRIC CRAB
Crab vs. Developmental stages n= 11
Control	Treatment
1	0
1	0
1	1
1	0
1	0
1	0
1	0
1	0
1	0
1	1
1	0
1: means acceptance of item
0: means rejection of item

[truncated: 8 more sheets: Set1 LateBrachiolaria 6d (Fig2B, Set2 Late brachiolaria 6d Fig2B, Blastula 1d (Fig 2C), Early brachiolaria 3d (Fig 2C), Late brachiolaria 6d (Fig 2C), Blastula 1d (fig 2D), Early Brachiolaria 3d (Fig 2D), Late Brachiolaria 6d (2D)]
