# Supplementary material for: Chemical defense in developmental stages and adult of the sea star Echinaster (Othilia) brasiliensis
Source: PeerJ. 2021 Jun 18;9:e11503. doi: 10.7717/peerj.11503 (PMC8216172; doi:10.7717/peerj.11503)
Supplement: Supplemental Information 5 [file peerj-09-11503-s005.xlsx]

## Sheet: Set 1 Blastula 1d (Fig 3A)
SYMPATRIC CRAB
Crab vs. Extracts n= 9
Control	Treatment
1	0
1	0
1	1
1	1
1	1
1	1
1	1
1	0
1	0
1: means acceptance of item
0: means rejection of item

## Sheet: Set 2 Blastula 1d (Fig 3A)
SYMPATRIC CRAB
Crab vs. Extracts n= 9
Control	Treatment
1	0
1	1
1	1
1	0
1	0
1	0
1	0
1	1
1	0
1: means acceptance of item
0: means rejection of item

## Sheet: Set1 EarlyBrachiolaria 3d (FigA
SYMPATRIC CRAB
Crab vs. Extracts n= 11
Control	Treatment
1	0
1	1
1	0
1	1
1	1
1	1
1	0
1	1
1	1
1	1
1	0
1: means acceptance of item
0: means rejection of item

## Sheet: Set2 EarlyBrachiolaria 3d (FigA
SYMPATRIC CRAB
Crab vs. Extracts n= 11
Control	Treatment
1	0
1	1
1	1
1	1
1	1
1	0
1	1
1	1
1	0
1	1
1	0
1: means acceptance of item
0: means rejection of item

## Sheet: Set 1 LateBrachiolaria 6d (FigA
SYMPATRIC CRAB
Crab vs. Extracts n= 11
Control	Treatment
1	0
1	0
1	0
1	0
1	0
1	1
1	1
1	0
1	0
1	1
1	0
1: means acceptance of item
0: means rejection of item

## Sheet: Set 2 LateBrachiolaria 6d (FigA
SYMPATRIC CRAB
Crab vs. Extracts n= 12
Control	Treatment
1	0
1	0
1	0
1	1
1	1
1	1
1	0
1	1
1	1
1	0
1	1
1	0
1: means acceptance of item
0: means rejection of item

## Sheet: Set 1 Blastula 1d (Fig 3B)
ALLOPATRIC CRAB
Crab vs. Extracts n= 9
Control	Treatment
1	1
1	1
1	1
1	1
1	1
1	0
1	1
1	1
1	1
1: means acceptance of item
0: means rejection of item

## Sheet: Set 2 Blastula 1d (Fig 3B)
ALLOPATRIC CRAB
Crab vs. Extracts n= 15
Control	Treatment
1	1
1	1
1	1
1	0
1	1
1	1
1	1
1	1
1	0
1	1
1	1
1	1
1	1
1	0
1	1
1: means acceptance of item
0: means rejection of item

## Sheet: Set1 EarlyBrachiolaria 3d (FigB
ALLOPATRIC CRAB
Crab vs. Extracts n= 8
Control	Treatment
1	1
1	1
1	1
1	0
1	1
1	1
1	1
1	0
1: means acceptance of item
0: means rejection of item

## Sheet: Set2 EarlyBrachiolaria 3d (FigB
ALLOPATRIC CRAB
Crab vs. Extracts n= 7
Control	Treatment
1	1
1	1
1	1
1	1
1	1
1	0
1	1
1: means acceptance of item
0: means rejection of item

[truncated: 8 more sheets: Set 1 LateBrachiolaria 6d (FigB, Set 2 LateBrachiolaria 6d (FigB, Blastula 1d (Fig 3C), Early Brachiolaria 3d (Fig 3C), Late Brachiolaria (Fig 3C), Blastula 1d (Fig 3D), Early brachiolaria 3d (Fig 3D), Late brachiolaria (Fig 3D)]
