# Supplementary material for: Chemical defense in developmental stages and adult of the sea star Echinaster (Othilia) brasiliensis
Source: PeerJ. 2021 Jun 18;9:e11503. doi: 10.7717/peerj.11503 (PMC8216172; doi:10.7717/peerj.11503)
Supplement: Supplemental Information 7 [file peerj-09-11503-s007.xlsx]

## Sheet: Set 1 (-NC) (Fig 4A)
SYMPATRIC CRAB
Crab vs. Extracts of adults from João Fernandes n= 14
Control	Treatment
1	0
1	0
1	1
1	0
1	0
1	0
1	1
1	0
1	0
1	0
1	1
1	0
1	0
1	0
1: means acceptance of item
0: means rejection of item

## Sheet: Set 2 (-NC) (Fig 4A)
SYMPATRIC CRAB
Crab vs. Extracts of adults from João Fernandes n= 16
Control	Treatment
1	0
1	0
1	0
1	0
1	0
1	1
1	0
1	0
1	0
1	0
1	0
1	1
1	0
1	0
1	0
1	1
1: means acceptance of item
0: means rejection of item

## Sheet: Set 1 (NC) (Fig 4A)
SYMPATRIC CRAB
Crab vs. Extracts of adults from João Fernandes n= 13
Control	Traatment
1	0
1	0
1	1
1	1
1	1
1	1
1	0
1	1
1	0
1	0
1	1
1	0
1	0
1: means acceptance of item
0: means rejection of item

## Sheet: Set 2 (NC) (Fig 4A)
SYMPATRIC CRAB
Crab vs. Extracts of adults from João Fernandes n= 16
Control	Treatment
1	0
1	0
1	0
1	1
1	1
1	0
1	0
1	0
1	1
1	1
1	0
1	1
1	1
1	0
1	0
1	0
1: means acceptance of item
0: means rejection of item

## Sheet: (+NC) (Fig 4A)
SYMPATRIC CRAB
Crab vs. Extracts of adults from João Fernandes n= 13
Control	Treatment
1	0
1	0
1	0
1	0
1	0
1	0
1	0
1	1
1	0
1	1
1	0
1	0
1	0
1: means acceptance of item
0: means rejection of item

## Sheet: Set 1 (-NC) (Fig 4B)
ALLOPATRIC CRAB
Crab vs. Extracts of adults from João Fernandes n= 12
Control	Treatment
1	0
1	1
1	1
1	0
1	1
1	1
1	0
1	1
1	0
1	1
1	0
1	1
1: means acceptance of item
0: means rejection of item

## Sheet: Set 2 (-NC) (Fig 4B)
ALLOPATRIC CRAB
Crab vs. Extracts of adults from João Fernandes n= 13
Control	Treatment
1	1
1	1
1	1
1	0
1	1
1	0
1	0
1	1
1	0
1	1
1	1
1	1
1	0
1: means acceptance of item
0: means rejection of item

## Sheet: Set 1 (NC) (Fig 4B)
ALLOPATRIC CRAB
Crab vs. Extracts of adults from João Fernandes n= 11
Control	Treatment
1	1
1	0
1	1
1	1
1	1
1	0
1	0
1	1
1	1
1	0
1	0
1: means acceptance of item
0: means rejection of item

## Sheet: Set 2 (NC) (Fig 4B)
ALLOPATRIC CRAB
Crab vs. Extracts of adults from João Fernandes n= 11
Control	Treatment
1	0
1	0
1	1
1	1
1	1
1	1
1	1
1	1
1	0
1	0
1	0
1: means acceptance of item
0: means rejection of item

## Sheet: (+NC) (Fig 4B)
ALLOPATRIC CRAB
Crab vs. Extracts of adults from João Fernandes n= 10
Control	Treatment
1	1
1	0
1	0
1	0
1	0
1	0
1	0
1	0
1	0
1	1
1: means acceptance of item
0: means rejection of item

[truncated: 10 more sheets: Set 1 (-NC) (Fig 4C), Set 2 (-NC) (Fig 4C), Set 1 (NC) (Fig 4C), Set 2 (NC) (Fig 4C), (+NC) (Fig 4C), Set 1 (-NC) (Fig 4D), Set 2 (-NC) (Fig 4D), Set 1 (NC) (Fig 4D), Set 2 (NC) (Fig 4D), (+NC) (Fig 4D)]
